# Supplementary material for: Focus on Polish nurses’ health condition: a cross-sectional study
Source: PeerJ. 2022 Mar 21;10:e13065. doi: 10.7717/peerj.13065 (PMC8944332; doi:10.7717/peerj.13065)
Supplement: Supplemental Information 1 [file peerj-10-13065-s001.xlsx]

## Sheet: Arkusz1
	DANE SOCJODEMOGRAFICZNE											CHOROBY I PROFILAKTYKA					INWENTARZ ZACHOWAŃ ZDROWOTNYCH																															IPAQ
Lp.	1. WIEK	2. Miejsce zamieszkania	3. Miejsce pracy	4. Etat	5. System pracy	6. Wykształcenie	7. Dodatkowe kwalifikacje	7.1 Specjalizacja	7.2 Kurs kwalifikacyjny	7.3 Kurs specjalistyczny	7.4 Kurs dokształcający	8. Samoocena stanu zdrowia	9. Udział w bad. Profilaktycznych innych niż badania okresowe wpracy	Jakie	10. Choroby przewlekłe	Jakie	IZZ - 1	IZZ - 2	IZZ - 3	IZZ - 4	IZZ - 5	IZZ - 6	IZZ - 7	IZZ - 8	IZZ - 9	IZZ - 10	IZZ - 11	IZZ - 12	IZZ - 13	IZZ - 14	IZZ - 15	IZZ - 16	IZZ - 17	IZZ - 18	IZZ - 19	IZZ - 20	IZZ - 21	IZZ - 22	IZZ - 23	IZZ - 24	IZZ - 25	IPAQ - A	IPAQ - B	IPAQ - C	IPAQ - D	IPAQ - E	IPAQ - F	IPAQ - ile dni?	IPAQ - ile minut?
1	52	1	1	1	2	2	Tak	1	1	1	1	2	Tak	Mammografia, USG j. brzusznej, usg piersi	Nie		5	2	4	1	4	5	2	2	4	4	2	1	4	4	3	2	4	4	2	1	4	4	4	2		nie	nie	nie	nie	nie	nie	3	120
2	52	2	1	1	2	2	Tak	0	0	0	1	2	tak	cytologia	tak	arytmia serca, RZS	4	2	3	2	4	2	1	2	3	3	2	3	4	2	3	2	4	2	3	5	3	3	4	2		nie	nie	nie	nie	nie	nie	5	nie jestem pewien
3	53	1	2	1	2	1	Tak	0	0	1	0	2	Tak	Mammografia	Tak	Zwyrodn. Kregosłupa	4	4	3	2	2	1	2	2	3	4	2	4	1	4	3	3	2	3	3	1	2	4	3	2		nie	nie	nie	nie	nie	nie	7	60
4	53	1	2	1	1	3	Tak	0	1	1	1	2	Tak	cytologia	nie		5	4	5	3	4	2	3	2	4	5	3	4	4	5	5	3	4	3	3	5	4	5	4	3		nie	nie	nie	nie	nie	nie	0	0
5	57	2	2	1	1	1	Tak	0	0	0	1	4	Tak	mamografia, cytologia	Tak	sarkoidoza, zwyr. Stawów	4	4	5	4	5	5	3	3	5	4	3	5	4	4	2	4	5	5	4	5	2	4	3	3		nie	nie	nie	nie	nie	nie	0	0
6	55	1	2	1	2	3	tak	1	1	1	0	2	tak	mammografia	tak	hipercholesterolemia	4	4	3	2	4	4	3	3	4	3	3	3	4	3	5	4	4	4	3	5	5	5	4	4		nie	nie	nie	nie	nie	nie	0	0
7	51	2	2	1	2	1	nie	0	0	0	0	2	nie		tak	Hashimoto	3	3	1	3	2	4	2	2	2	3	1	5	1	2	5	2	1	2	4	1	2	4	3	2		nie	nie	nie	nie	nie	nie	0	0
8	57	1	2	1	1	1	nie	0	0	0	0	2	nie		Tak	nadciśnienie, nadczynność tarczycy, bóle kręgosłupa	4	5	3	3	3	4	4	2	3	4	3	3	4	5	5	4	2	2	4	5	3	5	5	2		nie	nie	nie	nie	nie	nie	2	nie jestem pewien
9	51	1	1	1	2	3	tak	1	1	1	1	1	nie		nie		4	5	2	2	4	5	3	3	4	4	4	3	4	5	5	2	4	3	4	5	4	5	4	3		nie	nie	nie	nie	nie	nie	7	30
10	53	1	2	1	1	1	nie	0	0	0	0	2	nie		tak	nadciśnienie	2	5	3	3	3	4	3	2	4	5	3	4	4	4	4	4	4	3	4	2	5	4	4	3		nie	nie	nie	nie	nie	nie	1	60
11	47	1	2	1	1	3	tak	1	0	1	0	2	tak	cytologia, ginekolog	nie		5	3	3	1	5	2	4	2	5	5	3	5	4	2	5	3	4	3	3	5	5	5	4	3		nie	nie	nie	nie	nie	nie	3	60
12	56	1	2	1	1	1	nie	0	0	0	0	2	nie		tak	cukrzyca typ2	4	4	4	3	4	2	2	2	4	5	3	4	2	3	3	3	3	4	3	4	4	4	3	2		nie	nie	nie	nie	nie	nie	0	0
13	49	2	2	1	1	1	nie	0	0	0	0	3	nie		nie		3	2	4	3	3	5	2	3	2	3	2	3	3	3	4	3	3	3	3	5	3	4	3	3		nie	nie	nie	nie	nie	nie	3	90
14	55	1	1	1	2	1	nie	0	0	0	0	3	nie		nie		3	3	2	3	1	1	3	2	1	3	2	1	3	3	4	4	3	4	4	5	4	4	4	3		nie	nie	nie	nie	nie	nie	0	0
15	52	2	2	1	1	1	tak	1	1	1	1	2	nie		nie		4	5	2	2	4	5	4	2	4	3	2	4	4	2	5	4	4	2	2	5	2	5	2	2		nie	nie	nie	nie	nie	nie	2	30
16	56	1	2	2	1	1	nie	0	0	0	0	3	nie		tak	nadcz. Tarczycy	4	3	3	2	4	4	3	2	3	5	2	5	5	4	5	2	3	3	2	5	4	4	2	3		nie	nie	nie	nie	nie	nie	0	0
17	53	1	2	1	1	1	nie	0	0	0	0	2	tak	Mammografia, cytologia	nie		5	4	4	3	3	1	2	3	3	4	3	4	4	4	5	3	2	3	3	5	3	3	4	4		nie	nie	nie	nie	nie	nie	0	0
18	52	1	2	1	1	3	tak	1	0	0	0	2	tak	kolonoskopia	nie		4	5	3	3	4	3	4	3	5	4	4	3	4	3	5	4	4	3	3	5	4	4	4	3		nie	nie	nie	nie	nie	nie	0	0
19	55	1	2	1	2	2	tak	1	0	1	0	4	tak	cytologia	tak	alergia, zwyr. Stawów	4	5	5	4	5	3	5	4	4	3	4	4	5	5	1	5	5	5	5	4	4	5	4	5		nie	nie	nie	nie	nie	nie	4	15
20	52	1	1	1	2	1	tak	0	0	0	1	2	nie		nie		3	4	4	3	4	5	3	2	3	5	3	4	5	5	5	4	5	5	5	5	4	5	5	3		nie	nie	nie	nie	nie	nie	0	0
21	55	2	1	1	1	1	tak	0	0	0	1	2	tak	mmammografia, cytologia	tak	refluks żoładka	4	4	4	3	4	5	4	2	4	4	3	5	5	5	4	4	4	4	4	5	3	4	5	4		nie	nie	nie	nie	nie	nie	0	0
22	53	1	2	1	2	3	tak	1	0	0	0	1	nie		nie		5	4	3	2	4	5	2	2	4	3	2	4	4	2	5	3	4	3	3	5	5	5	3	4		nie	nie	nie	nie	nie	nie	0	0
23	47	1	2	1	1	1	tak	0	0	0	0	3	nie		tak	hashimoto, bielactwo	3	4	4	3	3	3	3	3	2	2	2	3	2	3	2	2	4	3	3	5	3	4	3	4		nie	nie	nie	nie	nie	nie	0	0
24	45	1	1	1	2	3	tak	0	0	1	0	2	nie		nie		2	4	2	2	2	5	4	2	2	3	3	4	2	2	4	4	2	2	2	5	2	4	4	3		nie	nie	nie	nie	nie	nie	2	30
25	52	2	1	1	2	3	tak	1	0	0	0	2	tak	mammografia, cytologia	tak	neurobolerioza	5	4	5	5	3	3	3	3	3	3	3	3	3	3	3	3	2	3	3	3	3	3	4	2		nie	nie	nie	nie	nie	nie	2	60
26	49	1	1	1	2	3	tak	1	0	0	0	2	tak	cytologia	tak	zwyr. Kregosłupa	4	4	3	5	2	1	3	3	3	4	3	3	3	2	4	5	2	4	3	1	3	4	4	2		nie	nie	nie	nie	nie	nie	1	60
27	53	1	1	1	2	3	tak	0	0	1	0	2	tak	kolonoskopia	tak	nadciśnienie	5	4	3	3	4	1	2	2	4	3	4	4	1	4	3	4	4	4	2	3	4	5	4	3		nie	nie	nie	nie	nie	nie	1	15
28	54	1	1	1	2	1	nie	0	0	0	0	2	nie		nie		2	2	2	3	3	3	1	2	2	2	3	3	1	1	2	2	2	3	3	3	2	1	3	4		nie	nie	nie	nie	nie	nie	0	0
29	53	1	2	1	1	1	tak	0	0	0	1	2	tak	Mammografia	nie		5	4	4	2	3	2	3	2	4	4	2	5	4	4	4	3	4	4	4	5	4	4	5	3		nie	nie	nie	nie	nie	nie	5	30
30	50	2	2	1	2	1	nie	0	0	0	0	1	nie		nie		4	4	5	4	4	5	5	2	2	3	5	2	3	3	5	4	4	1	5	5	3	2	5	2		nie	nie	nie	nie	nie	nie	5	60
31	52	2	2	1	1	3	tak	1	1	1	1	2	nie		nie		4	3	3	2	2	2	1	5	4	4	4	3	2	2	2	2	2	4	4	4	3	4	4	4		nie	nie	nie	nie	nie	nie	0	0
32	46	1	2	1	1	2	tak	0	1	0	0	2	nie		nie		4	5	2	1	4	1	1	1	5	2	1	5	4	2	5	1	4	1	1	5	4	1	3	2		nie	nie	nie	nie	nie	nie	0	0
33	48	2	1	1	2	2	tak	0	0	1	0	2	nie		nie		5	5	4	4	4	5	5	5	4	4	4	5	5	5	2	2	2	2	3	3	5	1	3	3		nie	nie	nie	nie	nie	nie	0	0
34	57	2	2	1	1	1	tak	1	1	1	1	2	nie		tak	nadciśnienie	4	5	5	4	5	3	3	4	4	4	3	4	2	4	3	4	3	4	5	4	4	4	4	4		nie	nie	nie	nie	nie	nie	2	15
35	57	2	2	1	1	2	tak	1	0	0	0	3	nie		nie		4	3	3	3	3	1	2	3	3	4	3	4	2	3	5	3	4	3	4	5	3	4	4	3		nie	nie	nie	nie	nie	nie	0	0
36	51	1	1	1	1	3	tak	0	0	1	0	2	tak	usg piersi	nie		4	4	2	2	5	4	3	2	4	3	2	3	5	2	4	3	4	3	3	5	3	5	4	3		nie	nie	nie	nie	nie	nie	4	60
37	52	1	1	1	2	3	tak	1	0	1	0	1	tak	Mammografia, cytologia	nie		5	4	3	1	5	5	4	1	3	4	2	3	3	2	5	1	3	1	3	5	3	4	3	3		nie	nie	nie	nie	nie	nie	0	0
38	54	2	2	1	2	2	tak	0	1	1	1	4	tak	usg piersi, Mammografia	tak	dna, reflux, zwyr.kreg. I stawów	5	5	5	3	5	1	2	2	4	5	3	4	5	4	5	2	2	1	5	5	4	5	5	1		nie	nie	nie	nie	nie	nie	5	30
39	47	1	2	1	2	2	tak	1	1	1	1	2	tak	kolonoskopia	tak	RZS, cukrzyca	4	5	5	2	5	1	3	2	5	5	3	5	5	5	5	2	4	2	5	5	5	5	5	3		nie	nie	nie	nie	nie	nie	5	20
40	51	1	2	1	1	1	tak	0	1	1	0	3	tak	USG J. B	TAK	nadciśnienie, COROBA SERCA	3	4	4	3	3	3	4	3	2	4	3	3	4	3	5	4	5	2	3	5	5	5	4	3		nie	nie	nie	nie	nie	nie	0	0
41	54	1	2	1	1	2	tak	0	1	1	0	4	tak	usg piersi, Mammografia	tak	nadciśnienie, zwyr. Kreg. I stawów	4	5	5	4	3	1	4	3	4	5	2	4	4	4	4	5	4	2	2	2	2	1	3	4		nie	nie	nie	nie	nie	nie	5	30
42	46	1	2	1	2	2	tak	0	1	0	0	1	nie		nie		4	5	3	4	3	5	5	4	5	4	5	3	5	5	5	5	5	5	5	5	4	5	5	5		nie	nie	nie	nie	nie	nie	0	0
43	58	2	2	1	1	1	nie	0	0	0	0	2	nie		tak	astma, migrena	4	5	5	3	3	5	4	3	4	5	4	3	4	3	5	4	3	2	3	5	3	4	4	3		nie	nie	nie	nie	nie	nie	0	0
44	49	1	2	1	1	3	tak	1	1	1	1	1	nie		nie		5	5	5	5	4	5	4	5	4	3	3	5	4	4	4	3	5	4	4	3	4	5	5	5		nie	nie	nie	nie	nie	nie	4	60
45	49	1	2	1	2	3	tak	0	0	1	0	2	nie		tak	astma	4	5	5	3	3	5	4	2	5	5	3	5	4	5	5	4	4	4	4	5	5	5	4	1		nie	nie	nie	nie	nie	nie	6	120
46	47	1	2	1	1	3	tak	1	0	0	0	2	nie		tak	alergia	4	3	4	4	3	5	4	3	4	4	4	5	4	4	5	4	4	4	4	5	4	5	4	4		nie	nie	nie	nie	nie	nie	3	40
47	51	1	1	1	2	1	tak	0	0	1	0	2	nie		nie		5	5	5	4	1	5	4	4	4	5	4	4	5	5	5	4	5	4	4	1	4	1	4	5		nie	nie	tak	nie	nie	nie	2	25
48	57	1	2	1	1	2	tak	0	1	0	1	2	tak	Mammografia, USG j. brzusznej, usg piersi, gastro i kolpnoskopia	tak	nadcisnienie, alergia, zwyr kregosł	4	4	4	4	4	5	4	3	4	4	3	3	4	5	5	4	4	5	3	5	3	3	4	3		nie	nie	nie	nie	nie	nie	2	20
49	54	2	2	1	2	3	tak	1	1	1	0	2	tak	mammmografia	tak	przewl. Zap. Stwów	3	4	3	2	1	4	2	2	2	3	2	2	3	4	3	4	3	2	5	3	4	3	4	4		nie	nie	nie	nie	nie	nie	0	0
50	56	2	2	1	1	2	tak	1	0	0	0	1	nie		tak	nadczynność tarczycy, nadciśnienie	4	2	4	3	2	1	3	2	4	4	2	3	4	4	4	3	4	4	2	1	4	3	4	1		nie	nie	nie	nie	nie	nie	4	30
51	57	1	2	1	1	1	tak	0	0	0	1	2	tak	cytologia, mammografia	nie		4	1	3	4	3	5	4	4	4	3	3	4	2	3	5	5	4	2	2	5	3	4	4	4		nie	nie	nie	nie	nie	nie	0	0
52	46	2	2	1	1	3	nie	0	0	0	0	2	nie		nie		2		2	2	4	3	4	4	3	3	4	4	3	3	3	3	4	4	3	2	2	4	4	3		nie	nie	nie	nie	nie	nie	0	0
53	47	1	1	1	2	3	tak	1	0	0	0	2	nie		nie		4	4	4	3	3	4	4	3	5	5	4	3	5	3	3	3	5	4	4	5	5	4	4	5		nie	nie	nie	nie	nie	nie	0	0
54	55	1	1	1	2	2	nie	0	0	0	0	2	nie		tak	RZS	4	3	5	5	4	5	4	4	5	5	5	5	5	5	5	5	5	4	4	5	5	5	5	4		nie	nie	nie	nie	nie	nie	7	60
55	55	2	2	1	1	1	tak	0	0	1	0	2	nie		nie		4	4	3	3	4	5	2	2	4	5	1	3	4	3	5	3	4	2	3	5	4	4	5	2		nie	nie	nie	nie	nie	nie	1	30
56	54	2	1	1	2	1	tak	0	0	0	1	2	tak	mammmografia	tak	arytmia, alergia	4	4	2	3	2	2	2	2	2	3	2	4	3	5	5	4	4	3	3	5	3	5	4	3		nie	nie	nie	nie	nie	nie	2	30
57	51	1	2	1	1	2	nie	0	0	0	0	1	nie		nie		2	2	5	3	2	5	2	2	2	4	2	2	4	2	5	3	3	2	2	5	4	2	2	2		nie	nie	nie	nie	nie	nie	7	20
58	56	1	2	1	1	3	nie	0	0	0	0	2	tak	Mammografia, cytologia, kolonoskopia	tak	nadciśnienie	4	4	4	2	4	2	2	2	4	4	2	4	4	2	4	2	2	2	4	1	4	4	4	2		nie	nie	nie	nie	nie	nie	2	30
59	55	1	1	1	2	3	tak	1	0	0	0	2	nie		nie		4	5	3	2	4	5	3	2	4	4	3	2	4	4	5	3	5	2	3	5	5	4	4	1		nie	nie	nie	nie	nie	nie	0	0
60	52	1	2	1	1	3	tak	1	0	0	0	2	nie		nie		3	5	3	4	3	5	2	2	2	2	1	1	3	2	4	5	4	2	3	5	5	4	4	4		nie	nie	nie	nie	nie	nie	2	20
61	57	1	2	1	2	1	tak	0	0	0	1	2	nie		nie		2	5	1	4	1	1	3	3	1	2	2	2	3	3	3	5	2	3	3	1	1	3	3	4		nie	nie	nie	nie	nie	nie	0	0
62	55	1	1	1	2	1	tak	0	0	0	1	2	tak	cytologia	nie		4	3	5	4	4	5	5	3	4	5	2	4	5	4	4	2	4	4	3	5	5	4	3	2		nie	nie	nie	nie	nie	nie	2	10
63	47	1	2	1	2	1	tak	0	0	0	1	2	nie		nie		4	4	4	3	3	5	4	3	3	5	2	4	3	4	4	4	2	2	3	5	3	3	2	4		nie	nie	nie	nie	nie	nie	0	0
64	49	1	2	1	1	3	nie	0	1	0	0	2	nie		tak	zmiany zwyrodnieniowe kręg.	3	3	2	4	1	1	2	4	3	5	2	3	1	1	5	3	1	2	2	1	3	3	2	5		nie	nie	nie	nie	nie	nie	0	0
65	49	1	2	1	1	3	nie	0	0	0	0	4	nie		nie		3	4	3	2	2	3	4	2	2	3	5	2	3	3	5	4	3	3	5	5	2	4	3	3		nie	nie	nie	nie	nie	nie	0	0
66	55	1	2	1	1	3	nie	0	0	0	0	1	tak	cytologia, mammografia	nie		5	5	3	3	3	1	3	3	4	3	3	3	3	3	5	4	4	4	4	5	2	3	5	1		nie	nie	nie	nie	nie	nie	6	120
67	52	1	2	1	1	3	nie	0	0	0	0	2	tak	cytologia	tak	nadciśnienie	3	4	4	3	4	5	4	3	4	4	4	2	3	3	2	3	4	3	4	3	3	5	4	2		nie	nie	nie	nie	nie	nie	0	0
68	50	1	1	1	2	3	tak	1	0	0	0	2	nie		nie		4	2	4	3	2	5	3	2	3	3	2	2	2	4	5	3	2	3	3	5	4	5	4	5		nie	nie	nie	nie	nie	nie	2	60
69	50	1	2	1	1	3	tak	1	0	0	0	1	nie		nie		3	5	3	4	3	1	2	4	3	5	3	3	5	4	2	5	4	1	2	5	3	5	3	4		nie	nie	nie	nie	nie	nie	0	0
70	50	1	2	1	1	1	tak	0	0	1	1	3	nie		nie		3	5	5	4	4	4	3	3	4	5	4	3	3	4	5	5	4	3	2	5	3	3	4	3		nie	nie	nie	nie	nie	nie	0	0
71	55	1	2	1	1	3	tak	1	1	0	0	2	tak	cytologia	nie		4	4	4	4	4	1	3	3	4	4	2	3	4	5	2	5	5	2	2	3	3	2	5	3		nie	nie	nie	nie	nie	nie	1	30
72	54	1	1	1	2	1	tak	0	0	1	0	2	tak	cytologia	nie		4	2	5	2	3	5	4	3	3	4	2	2	3	4	5	4	3	1	2	1	4	4	3	3		nie	nie	nie	nie	nie	nie	0	0
73	52	1	1	1	2	2	tak	1	0	0	0	2	nie		nie		4	4	3	3	3	3	3	2	3	3	1	5	2	3	4	3	1	1	2	5	4	2	5	2		nie	nie	nie	nie	nie	nie	2	nie jestem pewien
74	47	1	1	1	2	3	tak	1	1	1	0	1	nie		tak	RZS	4	4	4	3	4	5	5	3	4	5	4	5	5	5	3	3	4	4	4	5	1	5	4	4		nie	nie	nie	nie	nie	nie	1	nie jestem pewien
75	56	1	1	1	1	1	tak	0	0	0	1	2	nie		nie		5	2	3	4	4	1	4	4	4	4	4	1	4	5	2	2	2	4	3	2	2	4	4	4		nie	nie	nie	nie	nie	nie	0	0
76	51	1	1	1	2	1	tak	0	0	0	1	2	nie		nie		5	5	3	3	5	1	3	3	4	5	4	4	4	5	5	4	4	3	4	5	5	4	5	3		nie	nie	nie	nie	nie	nie	3	20
77	61	1	1	1	2	1	tak	1	1	0	0	3	nie		tak	nadciśnienie	4	3	3	3	2	5	3	3	2	4	3	3	2	5	5	3	2	3	3	5	3	4	4	3		nie	nie	nie	nie	nie	nie	0	0
78	57	1	1	1	1	1	tak	0	1	1	0	2	nie		nie		3	4	5	3	2	2	4	4	3	5	5	2	4	5	5	4	3	4	4	5	3	5	4	4		nie	nie	nie	nie	nie	nie	0	0
79	54	1	1	1	2	1	tak	1	1	1	1	3	nie		nie		3	1	2	1	2	1	3	2	2	4	2	2	2	2	5	1	2	2	1	5	1	3	3	3		nie	nie	nie	nie	nie	nie	0	0
80	64	1	2	1	1	1	tak	0	0	0	1	3	tak		nie		4	3	3	2	5	3	2	2	3	2	1	2	5	2	3	2	2	3	5	2	4	3	3	3		nie	nie	nie	nie	nie	nie	0	0
81	59	1	2	1	1	1	nie	0	0	0	0	3	tak		nie		3	4	2	4	2	2	3	1	2	4	2	2	4	2	4	4	5	1	1	5	2	3	4	2		nie	nie	nie	nie	nie	nie	0	0
82	57	1	1	1	2	3	tak	1	0	0	0	2	nie		tak	cukrzyca typ2	4	4	3	1	2	3	2	1	3	3	2	3	4	3	5	1	4	4	2	5	3	3	4	4		nie	nie	nie	nie	nie	nie	0	0
83	50	1	1	1	2	1	tak	0	1	0	1	2	nie		tak	zwyr. Kregosłupa	5	4	5	3	3	4	4	4	4	5	2	4	4	5	3	3	4	5	4	5	4	5	4	4		nie	nie	nie	nie	nie	nie	4	30
84	49	1	1	1	2	2	tak	1	1	0	0	3	tak	usg piersi	tak	cukrzyca typ2	4	3	3	4	3	2	2	2	3	4	2	2	2	3	4	4	4	2	2	5	2	4	3	3		nie	nie	nie	nie	nie	nie	0	0
85	55	1	1	1	2	1	tak	1	1	0	0	2	tak	usg piersi	nie		4	3	3	3	3	2	2	2	3	4	2	2	2	3	4	4	4	2	5	2	2	3	4	4		nie	nie	nie	nie	nie	nie	0	0
86	57	1	1	1	1	3	tak	1	0	0	0	2	tak	usg piersi	nie		4	5	5	4	4	5	3	4	4	4	4	5	3	5	5	4	5	2	3	5	4	3	4	4		nie	nie	nie	nie	nie	nie	1	60
87	50	1	1	1	2	3	tak	1	0	0	0	4	nie		nie		1	4	4	3	4	4	3	3	3	3	3	2	3	3	5	5	2	3	3	5	3	4	4	3		nie	nie	nie	nie	nie	nie	0	0
88	57	1	1	1	1	3	tak	1	0	0	0	2	nie		nie		5	5	3	3	3	2	4	2	5	5	4	1	4	3	5	3	5	5	4	5	4	5	5	4		nie	nie	nie	nie	nie	nie	0	0
89	50	1	1	1	2	2	tak	0	1	1	0	1	tak	usg J. B	nie		3	4	3	3	3	1	2	2	3	3	2	2	3	3	3	4	4	3	3	5	3	3	5	2		nie	nie	nie	nie	nie	nie	0	0
90	58	1	2	1	1	3	tak	1	0	0	0	3	nie		nie		4	3	3	3	3	5	5	4	3	3	4	2	3	2	4	2	2	4	4	5	3	3	2	4		nie	nie	nie	nie	nie	nie	0	0
91	57	1	1	1	2	2	tak	0	0	0	1	2	nie		tak	tarczyca	4	4	4	3	4	5	4	2	4	4	2	3	4	5	4	2	5	4	5	3	3	4	1	1		nie	nie	nie	nie	nie	nie	2	30
92	53	1	1	1	2	3	tak	1	0	0	1	2	tak	mammmografia	nie		4	4	2	2	2	5	4	2	2	4	2	4	2	4	5	2	2	4	5	5	4	4	4	2		nie	nie	nie	nie	nie	nie	1	20
93	47	1	1	1	2	3	tak	1	0	0	0	2	tak	cytologia	tak	nadciśnienie	3	5	4	3	4	3	4	4	4	4	3	3	4	3	4	4	5	4	3	5	4	4	3	4		nie	nie	nie	nie	nie	nie	0	0
94	53	1	1	1	2	2	tak	1	0	1	0	3	nie		tak	alegia	3	4	5	4	3	2	3	3	3	4	1	3	3	3	4	5	3	4	2	3	3	5	2	3		nie	nie	nie	nie	nie	nie	0	0
95	47	1	1	1	2	3	tak	1	1	1	1	1	nie		nie		5	3	1	2	3	5	2	1	4	4	2	1	3	4	5	2	1	2	2	5	4	5	3	1		nie	nie	nie	nie	nie	nie	0	0
96	50	1	1	1	2	2	tak	0	1	1	0	2	nie		nie		5	4	4	2	5	4	4	3	4	3	3	5	3	5	5	3	5	4	4	5	2	3	5	2		nie	nie	nie	nie	nie	nie	3	50
97	50	1	2	1	1	3	tak	1	0	0	0	2	nie		nie		5	4	2	2	5	3	1	1	2	3	2	1	2	2	5	3	2	1	2	2	3	5	5	1		nie	nie	nie	nie	nie	nie	0	0
98	58	1	1	1	1	3	tak	1	0	0	0	3	tak	mammografia	nie		3	3	3	3	5	5	3	4	3	4	3	4	3	4	3	3	3	3	2	2	4	4	2	3		nie	nie	nie	nie	nie	nie	0	0
99	58	1	2	1	1	3	tak	1	0	0	0	3	tak	cytologia	tak	alegia	5	3	4	2	5	5	4	3	5	4	4	5	4	5	5	4	4	4	4	5	4	4	4	4		nie	nie	nie	nie	nie	nie	0	0
100	48	1	1	1	2	1	tak	0	0	1	1	1	nie		nie		4	2	2	3	4	5	3	1	5	5	3	1	3	2	5	3	2	2	3	1	3	3	4	1		nie	nie	nie	nie	nie	nie	2	100
101	49	1	1	1	2	2	tak	0	0	0	1	2	nie		nie		3	3	4	2	3	1	2	3	3	5	2	4	4	4	5	2	3	3	5	5	4	4	4	4		nie	nie	nie	nie	nie	nie	0	0
102	49	1	1	1	2	3	tak	0	0	1	0	3	tak	cytologia	nie		4	3	5	3	4	1	4	2	2	5	3	5	5	3	5	4	4	3	4	4	3	5	5	3		nie	nie	nie	nie	grypa	nie	0	0
103	48	1	1	1	1	3	tak	1	0	0	0	1	nie		nie		4	5	3	5	3	1	3	3	3	4	2	3	4	3	1	5	3	3	3	5	5	3	4	3		nie	nie	nie	nie	nie	nie	3	20
104	47	1	1	1	1	3	tak	1	0	0	1	3	nie		tak	cukrzyca typ2	3	4	3	4	3	1	3	4	2	3	2	2	3	4	5	3	3	2	2	5	2	4	4	4		nie	nie	nie	nie	nie	nie	0	0
105	49	1	1	1	1	3	tak	1	1	1	1	2	tak	mammografia	tak	alegia	3	3	3	2	1	5	3	2	2	2	4	1	1	2	5	2	4	5	2	5	2	5	4	3		nie	nie	nie	nie	nie	nie	0	0
106	47	1	1	1	2	3	tak	0	0	0	1	2	nie		nie		4	4	5	4	2	1	2	3	3	4	4	1	3	1	3	4	2	2	2	3	5	4	4	3		nie	nie	nie	nie	nie	nie	0	0
107	47	1	1	1	2	3	tak	0	1	1	1	2	nie		nie		4	4	4	3	5	5	4	3	5	4	3	5	5	5	5	4	5	4	4	5	4	4	4	3		nie	nie	nie	nie	nie	nie	2	40
108	47	1	1	1	2	3	tak	0	0	0	1	1	nie		nie		4	4	4	4	4	5	4	2	4	3	4	2	4	3	5	4	4	3	3	5	3	4	5	2		nie	nie	nie	nie	nie	nie	0	0
109
110
111
112
113
114
115
116
117
118
119
120
121
122
123
124
125
126
127
128
129
130
131
132
133
134
135
136
137
138
139
140
141
142
143
144
145
146
147
148
149
150
151
152
153
154
155
156
157
158
159
160
161
162
163
164
165
166
167
168
169
170
171
172
173
174
175
176
177
178
179
180
181
[truncated: 30 more columns]

## Sheet: BAZA SPSS
Lp.	Age	Place of living	Place of work	Education	Additional qualificatons (1. Yes 2. No)	Courses	Self-assessment of health condition	Participation in preventive examinations	TC	HDL	TRG	LDL	GLUCOSE	SBD	DBD	ANDROID %	GENOID %	A/G	BMI	FAT (g)	FFM (g)	BCM	VAT (g)	VAT (cm3)	RMR	RSMI	BDM (g/cm2)	T- SCORE	Z- SCORE
1	52	1	1	2	1	1	2	1	237	45	212	149	98	93	60	31.8	32.2	0.99	26	19 940	45 969	2 470	256	271	1 367	7.88	1.184	1	1.4
2	52	2	1	2	1	0	2	1	188	50	165	105	91	128	84	54.2	49.8	1.09	29.2	34 009	38 880	2 408	2024	2145	1 226	6.85	1.155	0.7	0.7
3	53	1	2	1	1	0	2	1	202	53	105	128	82	133	76	23.2	36.8	0.63	21.5	13 690	33 950	1 724	80	85	1 116	6.73	0.931	-1.5	-0.1
4	53	1	2	3	1	1	2	1	241	77	141	136	6	141	81	24.2	38.7	0.63	21.2	18 270	39 761	2 067	123	130	1 237	5.91	1.027	-0.5	0.2
5	57	2	2	1	1	0	4	1	285	51	203	193	94	124	81	45.2	44.2	1.02	27.1	29 062	40 050	1 929	1106	1173	1 240	6.72	0.965	-1.1	-0.5
6	55	1	2	3	1	1	2	1	237	63	216	130	126	107	74	47	40.8	1.15	26.3	26 220	40 811	2 220	770	816	1 261	7.37	1.086	0.1	0.5
7	51	2	2	1	2	0	2	2	209	59	105	129	80	125	77	42.6	40.2	1.06	24.1	26 292	40 345	2 168	878	931	1 251	5.56	1.055	-0.3	0
8	57	1	2	1	2	0	2	2	285	51	203	193	106	152	92	56.5	40	1.41	30.2	35 400	42 996	2 425	1825	1934	1 308	7.35	1.157	0.8	1
9	51	1	1	3	1	1	1	2	187	78	92	91	83	107	69	19.6	39	0.5	20.8	15 611	38 080	2 235	220	233	1 207	6.44	1.16	0.8	1.6
10	53	1	2	1	2	0	2	2	228	56	159	140	86	160	96	34.5	35	0.99	22	17 273	36 012	1 940	350	371	1 161	6.18	1.033	-0.5	0.6
11	47	1	2	3	1	0	2	1	214	66	84	132	86	112	67	40	38.2	1.05	23.1	20 993	37 432	2 368	493	522	1 197	6.26	1.256	1.7	1.9
12	56	1	2	1	2	0	2	2	183	40	230	97	114	122	79	44.1	37.5	1.18	28.2	24 964	39 163	2 059	1194	1266	1 225	7.21	1.121	0.4	1.5
13	49	2	2	1	2	0	3	2	213	64	125	124	91	120	78	44.2	45.1	0.98	29.1	33 371	48 954	3 012	650	689	1 437	8.18	1.358	2.8	2.2
14	55	1	1	1	2	0	3	2	237	59	160	146	94	141	80	43.9	51.3	0.86	27.3	28 831	38 688	2 207	360	381	1 219	6.81	1.146	0.7	1.2
15	52	2	2	1	1	1	2	2	163	47	199	76	78	121	61	40.4	40	1.01	25.9	25 806	44 467	2 406	786	833	1 336	7.1	1.139	0.6	0.7
16	56	1	2	1	2	0	3	2	248	48	211	157	109	153	70	47	48.6	0.97	33.3	35 904	44 995	2 651	799	847	1 352	8.13	1.381	3	3.3
17	53	1	2	1	2	0	2	1	256	62	148	164	103	140	92	43.2	35.2	1.23	28	26 114	44 895	2 465	753	798	1 346	8.16	1.255	1.7	2
18	52	1	2	3	1	0	2	1	266	57	215	166	115	116	75	41.6	38.5	1.08	25.2	24 853	41 660	2 247	619	656	6.63		1.169	0.9	1.3
19	55	1	2	2	1	0	4	1	192	70	216	79	111	125	82	44.3	36.4	1.22	27.5	27 010	43 760	2 366	983	1042	7.11		1.059	-0.2	0.4
20	52	1	1	1	1	0	2	2	250	40	108	189	88	124	88	51.5	52.8	0.98	25.5	33 466	36 654	2 113	1133	1201	1 177	6.21	1.087	0.1	0.2
21	55	2	1	1	1	0	2	1	160	54	93	87	103	120	78	33.3	38	0.88	20.3	16 503	33 637	1 775	198	210	1 111	5.83	0.937	-1.4	-0.1
22	53	1	2	3	1	0	1	2	215	88	180	126	109	123	75	53.1	56.6	0.94	31.5	40 026	39 988	2 223	1039	1101	1 245	7.41	1.1	0.2	-0.1
23	47	1	2	1	1	0	3	2	240	89	118	128	88	146	92	32.6	44.7	0.73	21.8	23 428	40 635	2 667	245	259	1 266	5.51	1.201	1.2	1.3
24	45	1	1	3	1	0	2	2	202	58	166	111	111	99	63	23.2	36.1	0.64	22.9	15 322	39 020	1 858	166	176	1 218	6.95	1.016	-0.6	-0.2
25	52	2	1	3	1	0	2	1	270	39	279	174	97	134	80	40.9	42.7	0.96	27.9	25 955	43 132	2 337	508	539	1 309	7.81	1.219	1.4	1.5
26	49	1	1	3	1	0	2	1	191	55	89	118	81	129	71	35.4	40.7	0.87	26	26 496	46 293	2 614	677	718	1 376	7.23	1.283	2	1.8
27	53	1	1	3	1	0	2	1	237	48	263	136	92	168	87	50	41.1	1.22	30.5	30 820	42 889	2 148	1114	1181	1 300	7.96	1.087	0.1	0.3
28	54	1	1	1	2	0	2	2	270	42	222	184	120	154	98	54.4	44.5	1.22	29.9	34 269	40 711	2 473	2085	2210	1 264	7.34	1.247	1.7	1.8
29	53	1	2	1	1	0	2	1	172	64	91	90	112	120	89	35.4	42.3	0.84	24	22 773	40 364	2 489	541	573	1 257	6.65	1.168	0.9	1.3
30	50	2	2	1	2	0	1	2	219	72	63	134	79	140	87	22.4	32.7	0.69	20.7	14 321	37 062	2 205	152	161	1 187	6.27	1.151	0.7	1.6
31	52	2	2	3	1	1	2	2	270	39	279	174	110	148	92	46.4	40	1.16	29.8	31 739	48 187	2 410	1 331	1 411	1 410	7.62	1.244	1.6	1.4
32	46	1	2	2	1	1	2	2	143	44	66	86	80	94	62	28.7	30.3	0.95	22.5	14 797	38 967	1 831	140	148	1 217	7.04	1.001	-0.8	-0.4
33	48	2	1	2	1	0	2	2	161	15	51	136	98	112	61	24.5	38.9	0.63	21.9	18 775	44 208	2 820	227	240	1 339	6.5	1.237	1.6	1.8
34	57	2	2	1	1	1	2	2	170	51	57	108	100	148	98	45.5	48.8	0.93	27.2	30 212	38 486	2 440	698	739	1 219	6.8	1.211	1.3	1.7
35	57	2	2	2	1	0	3	2	220	74	75	131	97	118	71	44.8	49.2	0.91	34	36 295	48 882	2 178	595	631	8.74		1.045	-0.4	-0.3
36	51	1	1	3	1	0	2	1	209	65	133	117	103	125	75	26.6	32.8	0.81	21.6	15 176	37 835	2 394	119	126	1 206	6.16	1.207	1.3	2.1
37	52	1	1	3	1	0	1	1	244	83	139	134	90	120	80	40.8	42.3	0.96	25	23 200	40 111	2 227	713	756	1 247	7.18	1.137	0.6	1.1
38	54	2	2	2	1	1	4	1	172	42	207	88	98	124	76	43.2	38.4	1.12	27.2	24 642	45 666	2 414	828	878	1360	8.05	1.165	0.8	1.3
39	47	1	2	2	1	1	2	1	247	51	206	155	110	140	86	47.4	39.6	1.2	28.8	29 709	40 895	2 360	1663	1763	1265	7.16	1.243	1.6	1.4
40	51	1	2	1	1	1	3	1	210	56	116	131	94	170	87	48.7	41.8	1.16	27.2	26 136	38 932	2 493	1031	1093	1229	6.78	1.248	1.7	1.9
41	54	1	2	2	1	1	4	1	212	35	395	98	96	168	98	53.5	38.6	1.39	29.5	31 902	41 235	2 504	2131	2259	1275	6.96	1.322	2.4	2.6
42	46	1	2	2	1	1	1	2	281	67	163	182	93	155	89	62.2	47.7	1.3	40.5	48 068	49 678	2 724	1443	1530	1 445	9.92	1.311	2.3	0.8
43	58	2	2	1	2	0	2	2	230	40	108	169	120	153	96	27	38.3	0.7	21.9	16 505	35 722	1 899	226	239	1 154	6.55	1.017	-0.6	0.9
44	49	1	2	3	1	1	1	2	162	59	79	88	90	106	68	19.5	31.3	0.62	23.2	12 098	40 767	1 844	201	213	1 252	7.93	0.957	-1.2	-0.5
45	49	1	2	3	1	0	2	2	232	57	100	155	79	128	80	33.2	34.8	0.96	24.3	19 771	40 977	2 363	279	296	1 267	7.1	1.224	1.4	1.8
46	47	1	2	3	1	0	2	2	197	47	122	125	87	128	72	42.5	36.5	1.16	25.4	23 412	44 134	2 660	533	565	7.67		1.284	2	1.9
47	51	1	1	1	1	0	2	2	160	62	152	67	136	129	81	56.1	47.5	1.18	40.3	48 000	49 810	2 471	1 705	1 807	1 443	9.47	1.193	1.1	0
48	57	1	2	2	1	1	2	1	207	38	226	124	101	159	90	53.2	43	1.24	34.6	36 997	43 143	2 331	1345	1425	1309	8.19	1.223	1.4	1.7
49	54	2	2	3	1	1	2	1	288	61	126	201	88	126	80	56.4	51.8	1.09	37.1	48 168	48 163	2 648	975	1034	1 414	8.83	1.183	1	0.1
50	56	2	2	2	1	0	1	2	164	21	304	82	104	148	92	47.1	36.4	1.29	30.3	27 721	46 738	2 216	1374	1456	1377	8.73	1.079	0	0.2
51	57	1	2	1	1	0	2	1	272	56	144	188	101	157	94	36.8	39.6	0.93	22.8	20 297	33 586	1 582	422	447	1106	5.92	0.931	-1.5	0.1
52	46	2	2	3	2	0	2	2	258	67	268	137	89	128	79	48.9	44.4	1.1	26.7	26 711	36 233	2 066	489	518	1167	7.2	1.131	0.5	0.5
53	47	1	1	3	1	0	2	2	168	36	96	112	94	109	74	53.4	46.3	1.15	32.3	41 894	51 267	2 790	1524	1616	1 478	8.22	1.236	1.5	0.2
54	55	1	1	2	2	0	2	2	221	72	97	129	89	107	67	23.2	37.7	0.62	19.9	14 568	34 643	1 837	73	77	1 132	5.77	0.981	-1	0.4
55	55	2	2	1	1	0	2	2	265	41	179	189	103	146	80	45.7	41	1.11	30.1	32 233	45 824	2 300	615	652	1 361	8.09	1.075	-0.1	0.1
56	54	2	1	1	1	0	2	1	261	37	135	198	94	123	65	55.5	49.5	1.12	35.9	37 165	38 867	1 987	1116	1183	1 218	8.08	1.061	-0.2	0.1
57	51	1	2	2	2	0	1	2	232	44	153	144	98	125	66	47.8	42.8	1.12	32.4	35 153	46 809	3 188	825	874	1 398	8.15	1.516	4.3	3.9
58	56	1	2	3	2	0	2	1	239	96	129	118	96	142	78	60.9	50.7	1.2	38	46 497	47 017	2 806	2 225	2 359	1 395	8.87	1.305	2.2	1.4
59	55	1	1	3	1	0	2	2	210	41	273	114	105	158	91	48.6	38.2	1.27	30	31 293	47 328	2 462	1 742	1 846	1 394	8.15	1.178	1	1.2
60	52	1	2	3	1	0	2	2	190	61	86	111	95	110	70	52.7	50.4	1.05	34.4	43 140	50 260	2 702	1 169	1 239	1 456	8.98	1.201	1.2	0.3
61	57	1	2	1	1	0	2	2	214	36	461	178	115	166	95	60.8	53	1.15	41.5	61 059	53 779	2 814	3 391	3 594	1 528	8.83	1.289	2.1	1.8
62	55	1	1	1	1	0	2	1	273	65	12	140	95	144	78	38.4	45.4	0.85	26.2	25 867	40 811	2 413	423	448	1 265	7.15	1.19	1.1	1.6
63	47	1	2	1	1	0	2	2	161	47	157	82	83	165	89	41.2	37.9	1.09	24.6	23 192	40 603	2 325	1 102	1 168	1 259	6.56	1.156	0.8	0.8
64	49	1	2	3	2	1	2	2	175	81	90	76	93	131	76	25.9	38.6	0.67	22.7	19 803	42 442	2 394	5	5	1 296	6.22	1.187	1.1	1.3
65	49	1	2	3	2	0	4	2	196	61	110	113	86	116	76	18.2	29.9	0.61	20.4	13 695	44 262	2 365	112	119	1 332	6.97	1.089	0.1	0.6
66	55	1	2	3	2	0	1	1	242	66	73	161	90	147	86	55	47.2	1.16	29.7	37 072	41 410	2 134	1 778	1 885	1 271	7.24	1.042	-0.4	-0.2
67	52	1	2	3	2	0	2	1	148	56	225	92	93	162	88	54.2	47	1.15	34.4	39 375	48 150	2 489	1 509	1 599	1 411	9.13	1.225	1.4	1
68	50	1	1	3	1	0	2	2	184	54	82	113	104	126	79	53.1	43.6	1.22	29.4	33 446	42 472	2 303	1 268	1 344	1 295	7.39	1.161	0.8	0.5
69	50	1	2	3	1	0	1	2	197	94	45	104	87	125	69	32.2	42.2	0.76	25.6	21 322	38 461	2 187	249	264	1 214	6.96	1.181	1	1.4
70	50	1	2	1	1	0	3	2	226	55	194	133	100	154	87	53.9	47.6	1.13	32	39 641	45 183	2 702	2 033	2 155	1 356	7.42	1.227	1.5	0.8
71	55	1	2	3	1	1	2	1	229	47	127	157	101	148	86	49	48	1.02	36.1	36 999	49 325	2 532	739	783	1 435	9.47	1.257	1.8	1.4
72	54	1	1	1	1	0	2	1	219	49	148	140	110	193	89	57.4	44.9	1.28	31.1	40 371	47 639	2 620	1 969	2 087	1 403	7.84	1.214	1.3	0.8
73	52	1	1	2	1	0	2	2	229	56	109	151	109	142	81	43.1	40.9	1.05	25.8	27 280	41 566	2 356	747	792	1 278	6.92	1.126	0.5	0.6
74	47	1	1	3	1	1	1	2	227	59	127	143	91	111	77	47.1	41	1.15	27	31 616	45 996	2 224	547	580	1363	7.13	1.104	0.2	-0.2
75	56	1	1	1	1	0	2	2	240	39	404	202	85	158	94	60.9	50.7	1.2	38	46 497	47 017	2 806	2 225	2 359	1 395	8.87	1.305	2.2	1.4
76	51	1	1	1	1	0	2	2	284	56	168	194	84	114	74	51.8	41.1	1.26	30.8	31 698	43 294	2 542	1 708	1 810	1 316	7.86	1.254	1.7	1.6
77	61	1	1	1	1	1	3	2	309	50	284	202	108	141	90	60.3	53.2	1.13	34.1	48 526	43 214	2 202	1938	2054	1308	7.55	1.062	-0.2	-0.4
78	57	1	1	1	1	1	2	2	226	70	197	117	106	126	72	46.6	50	0.93	30.4	32 999	41 960	2 174	948	1 004	1282	7.72	1.169	0.9	1.1
79	54	1	1	1	1	1	3	2	232	60	115	150	88	140	88	46.8	46.1	1.02	30.4	31 348	41 968	2 186	884	937	1 283	7.85	1.176	0.9	1
80	64	1	2	1	1	0	3	1	288	35	169	254	103	127	80	29.5	34	0.87	21.5	18 798	39 748	2 148	272	288	1238	6.3	1.048	-0.3	1.1
81	59	1	2	1	2	0	3	1	247	56	206	149	97	122	78	55	47.2	1.16	29.7	37 072	41 410	2 134	1 778	1 885	1 271	7.24	1.042	-0.4	-0.2
82	57	1	1	3	1	0	2	2	342	70	212	229	114	120	63	37.3	43.1	0.87	26	25 307	43 574	2 711	621	658	1 325	7.57	1.305	2.2	2.9
83	50	1	1	1	1	1	2	2	258	65	129	167	98	132	84	26.7	40.4	0.66	24.2	20 853	39 117	2 168	87	92	1 226	6.93	1.147	0.7	1.1
84	49	1	1	2	1	1	3	1	236	43	123	168	95	114	69	43.2	37	1.17	21.1	19 366	32 995	2 149	573	608	1 105	5.66	1.257	1.7	2.5
85	55	1	1	1	1	1	2	1	204	61	99	123	83	117	74	46.2	46.2	1	27	29 809	39 978	2 197	651	691	1 244	7.45	1.144	0.6	1
86	57	1	1	3	1	0	2	1	263	45	174	217	95	112	66	35.4	44.7	0.79	21.9	21 829	35 551	2 133	100	106	1 155	5.8	1.134	0.5	1.7
87	50	1	1	3	1	0	4	2	137	57	68	66	87	110	66	42.8	42.4	1.01	29.3	28 829	43 885	2 544	692	733	1 328	7.85	1.298	2.2	2
88	57	1	1	3	1	0	2	2	237	78	76	144	90	134	80	35.4	33.6	1.06	18.1	14 934	30 491	1 810	438	464	1 049	4.84	1.032	-0.5	1.1
89	50	1	1	2	1	1	1	1	267	45	208	180	102	155	91	44.1	43.4	1.02	29.3	28 920	43 457	2 775	666	706	1 324	8.08	1.349	2.7	2.5
90	58	1	2	3	1	0	3	2	189	54	107	113	90	153	81	55.8	50.3	1.11	32.4	40 052	41 789	2 597	1 695	1 797	1 287	7.5	1.284	2	2.2
91	57	1	1	2	1	0	2	2	199	74	64	113	87	123	74	43.4	44.3	0.98	26.8	28 435	41 883	2 843	633	671	1 294	7.19	1.332	2.5	3
92	53	1	1	3	1	0	2	1	210	56	167	120	96	141	92	60.9	50.7	1.2	38	46 497	47 017	2 806	2 225	2 359	1 395	8.87	1.305	2.2	1.4
93	47	1	1	3	1	0	2	1	217	82	65	122	89	158	90	22.1	28.4	0.78	16.7	9 862	30 854	2 006	328	347	1 060	5.25	1.085	0	1.1
94	53	1	1	2	1	0	3	2	250	78	132	145	91	143	80	48.5	51.9	0.93	25.4	29 642	35 477	1 634	938	994	1 144	6.33	0.904	-1.7	-1.2
95	47	1	1	3	1	1	1	2	173	61	60	100	90	96	70	21.3	33.8	0.63	19.7	16 421	41 224	2 600	150	159	1 276	6.23	1.201	1.2	1.6
96	50	1	1	2	1	1	2	2	232	62	153	170	77	120	76	39.5	37.1	1.07	24.5	22 858	43 836	2 466	471	500	1 325	7.35	1.164	0.8	1
97	50	1	2	3	1	0	2	2	208	109	50	99	77	101	67	22.2	33.3	0.67	21.2	15 849	43 404	2 297	148	157	1 313	6.54	1.121	0.4	0.9
98	58	1	1	3	1	0	3	1	221	51	117	146	87	110	68	45.2	39.9	1.13	26	28 663	42 866	2 875	1 138	1 206	1 314	6.71	1.361	2.8	3.5
99	58	1	2	3	1	0	3	1	250	50	144	171	90	119	77	56.8	44.2	1.29	31.2	37 948	43 663	2 118	2288	2425	1315	7.8	1.037	-0.4	-0.4
100	48	1	1	1	1	0	1	2	162	50	83	95	87	110	61	11.4	22.3	0.51	21	10 875	47 415	2 826	119	126	1403	7.46	1.321	2.4	2.6
101	49	1	1	2	1	0	2	2	225	43	159	150	96	146	88	48.9	42.4	1.15	30.2	29 583	41 980	2 443	963	1 021	1 288	7.96	1.295	2.1	1.8
102	49	1	1	3	1	0	3	1	249	62	111	165	75	107	73	36.1	37.2	0.97	19.7	17 130	35 313	2 065	341	362	1 149	5.51	1.097	0.2	0.7
103	48	1	1	3	1	0	1	2	245	73	251	121	95	137	87	31.2	41.7	0.75	21.5	17 750	34 044	2 213	138	146	1 127	5.84	1.215	1.3	1.8
104	47	1	1	3	1	0	3	2	147	48	184	62	104	124	83	46.6	44.5	1.05	27.1	29 314	40 799	2 450	1 118	1 185	1 265	6.83	1.245	1.6	1.3
105	49	1	1	3	1	1	2	1	147	53	119	70	103	108	68	45.3	48.1	0.94	26.4	28 791	39 324	2 912	887	941	1245	6.53	1.422	3.4	3.1
106	47	1	1	3	1	0	2	2	182	51	116	108	90	150	84	34.1	45.6	0.75	23.9	25 284	41 983	2 440	279	295	1 288	6.52	1.094	0.1	0
107	47	1	1	3	1	1	2	2	166	70	74	82	92	124	77	26.8	36.6	0.73	20.1	18 157	41 287	3 041	79	84	1 286	5.96	1.323	2.4	2.6
108	47	1	1	3	1	0	1	2	243	70	277	118	90	153	89	56.9	51.3	1.11	54.5	49 183	54 138	3 694	2 325	2 465	1 552	8.53	1.564	4.8	3.3
