# Supplementary material for: Focus on Polish nurses’ health condition: a cross-sectional study
Source: PeerJ journal article supplement (doi:10.7717/peerj.13065), 2022-03-21
Supplement: Survey_questionnaire.pdf [file Survey_questionnaire.pdf]

**SURVEY QUESTIONNAIRE – NURSES’ HEALTH CONDITION**

Socio-demographic data of survey nurses:

**Age:** .....

**Place of residence:**

- City
- Village

**Place of work:**

- Hospital
- Ambulatory

**Work system:**

- One shift work
- Shift work and night duty

**Education:**

- Medical secondary education
- Bachelor’s degree
- Master’s degree

**Additional qualification:**

- No
- Yes

**Self-assessment of health condition:**

- Very good
- Good
- I have no opinion
- Bad

**Participation in preventive examinations:**

- No
- Yes
